1 **Wounding promotes root regeneration through a cell wall integrity**  
2 **sensor, the receptor kinase FERONIA**

3 **Qijun Xie<sup>1</sup>, Weijun Chen<sup>1</sup>, Fan Xu<sup>1</sup>, Shiling Ouyang<sup>1</sup>, Jia Chen<sup>1</sup>, Xuening Wang<sup>1</sup>,**  
4 **Yirong Wang<sup>1</sup>, Longfer Mao<sup>1</sup>, Wenkun Zhou<sup>2</sup><sup>#</sup>, Feng Yu<sup>1</sup><sup>#</sup>**

5 1. State Key Laboratory of Chemo/Biosensing and Chemometrics, College of Biology,  
6 and Hunan Key Laboratory of Plant Functional Genomics and Developmental  
7 Regulation, Hunan University, Changsha 410082, P.R. China.

8 2. State Key Laboratory of Plant Physiology and Biochemistry, College of Biological  
9 Sciences, China Agricultural University, Beijing, 100193 China.

10 <sup>#</sup> Corresponding authors: E-mail: zhouwenkun@cau.edu.cn; feng\_yu@hnu.edu.cn

11 **ABSTRACT**

12 Wounding caused by various stresses is the initial event of plant regeneration.  
13 However, the mechanisms underlying the early wounding responses to promote plant  
14 regeneration remain largely unknown. Here, we report that the receptor kinase  
15 FERONIA (FER) interacts with Topless/Topless-related proteins (TPL/TPRs) to  
16 regulate the expression of regeneration-related genes to modulate root tip regeneration.  
17 One ligand of FER, rapid alkalization factor 33 (RALF33), is stimulated by  
18 wounding and functions together with FER to promote regeneration. Single-cell  
19 sequencing data showed that the low-differentiation cell types in the stele may  
20 account for the enhanced regeneration ability in the *fer* mutant, especially in the  
21 columella and quiescent center (QC). Further interaction assays and analysis of the  
22 gene expression patterns in low-differentiation cell types confirmed that FER interacts  
23 with TPL/TPRs to regulate the expression of downstream regeneration-related genes.  
24 One of their downstream targets, an essential transcription factor (TF) in root  
25 regeneration, *ERF115*, acts downstream of FER-TPL/TPRs to control regeneration.  
26 Our results suggested a signaling pathway between the early wounding response and  
27 regeneration processes in roots.

28

29 **One-sentence summary:** RALF33-FER serves as an early signaling module between  
30 wounding and regeneration by functioning with TPL/TPRs in roots.

31

32 **Running title:** RALF33-FER regulates wounding-induced root tip regeneration.

33

34 **Keywords:** wounding, regeneration, root, RALF33, FERONIA, TPL/TPRs

## 35 INTRODUCTION

36 The bodies of both plants and animals are capable of repairing wounded tissues or  
37 organs, and this ability relies on a process termed regeneration. In plants, most organs  
38 have pluripotent cells that allow them to regenerate after wounding (1). After  
39 wounding, plants produce a series of second messengers (e.g., reactive oxygen species  
40 (ROS) and calcium) and elevate their levels of wound-related hormones (such as  
41 jasmonic acid (JA) and ethylene) (2, 3). Then, transcriptomic remodeling in cells  
42 around the wounding site is triggered, followed by the dedifferentiation and  
43 redifferentiation of these cells (4). A key transcription factor (TF) in the JA signaling  
44 pathway, MYC2, was reported to be an essential TF during wounding-induced  
45 regeneration, acting by binding directly to the promoter of two AP2/ERF TFs, namely,  
46 *ERF109* and *ERF115* (5). *ERF109* also upregulates *ANTHRANILATE SYNTHASE*  $\alpha$ 1  
47 (*ASA1*), a tryptophan biosynthesis gene in the auxin biosynthesis pathway, which  
48 may be a hormonal basis of regeneration (6-8). In addition, factors participating in  
49 regeneration processes, such as WINDs, PLTs, WOXs, and BOP1, have been  
50 identified (9-12). However, compared to the comprehensive identification of early  
51 wounding responses/signals (JA, ROS, etc.) and elements that control regeneration  
52 (*ERF115*, *ASA*, PLTs, etc.), the molecular basis or details of the signaling pathways  
53 that function between the early wounding responses/signals and regeneration  
54 processes remain largely unknown.

55 Receptor-like kinases (RLKs) are well known for their ability to transduce signals  
56 across membranes (13, 14). *FERONIA* (*FER*), a well-studied RLK, is known to  
57 respond to numerous stresses, including salt (15), temperature fluctuations (7),  
58 mechanical stress (16), and pathogens (17-19), reflecting its versatility in response to  
59 environmental cues. Importantly, *FER* is known to sense cell wall integrity during salt  
60 stress. The extracellular malectin-like domain of *FER* interacts directly with pectin in  
61 the cell wall. Salt stress-induced degradation of pectin was shown to be sensed by  
62 *FER* to trigger cell wall repair processes (15). Moreover, *FER* is functional in the

63 development of several organs, such as leaves, cotyledons and seeds (20, 21). *FER*  
64 regulates seed size by inhibiting cell division during embryonic development (21).  
65 These observations suggest a potential role of *FER* in modulating cell differentiation  
66 after sensing wounding.

67 Herein, we report the participation of *FER* as a negative regulator in the early  
68 wounding signaling cascade to suppress root tip regeneration. One ligand of *FER*,  
69 rapid alkalization factor 33 (*RALF33*), was found to accumulate in response to  
70 wounding and subsequently promote root regeneration. *FER* exhibited physiological  
71 interactions with Topless/Topless-related proteins (*TPL/TPRs*) to regulate the  
72 expression of *ERF115*. Based on our results, we present a model of the signaling  
73 cascade that occurs between early wounding signaling and root tip regeneration.

## 74 **RESULTS**

### 75 ***FER* represses root tip regeneration**

76 To determine whether *FER* is functional during wounding-induced regeneration, we  
77 performed root tip resection (22) and evaluated the regeneration rates of *fer-4*, a  
78 loss-of-function mutant of *FER* (23). Root tip resection allowed the removal of the  
79 root stem cell niche and meristem (Fig. 1A). The remaining stumps could regenerate  
80 the same organization based on the competence of the stump cells. After resection,  
81 *fer-4* presented a greatly enhanced capacity for root tip regeneration, especially type  
82 III resection, involving the removal of approximately 3/4 of the meristem (Fig. 1A-C).  
83 When the meristem was completely removed during type IV resection, the wild type  
84 (WT, Col-0) lost its regeneration capacity completely. Meanwhile, *fer-4* exhibited a  
85 considerable frequency of regeneration (Fig. 1 B-C). These data indicate that the *fer-4*  
86 roots had higher regeneration rates, which is surprising considering the weak features  
87 of the aboveground tissues of *fer-4* (e.g., small rosettes). The same trend was  
88 exhibited by *srn*, another mutant line of *FER* (C24 background) (23, 24). These  
89 results indicate that *FER* negatively regulates root tip regeneration.

90 We observed that *fer-4* and *srn* had enlarged meristems and increased columella cell

91 layers (Fig. S1A-C). In parallel, EDU (5-ethynyl-2'-deoxyuridine) staining also  
92 revealed stronger division activity in the root tip of *fer-4* (Fig. S1D). Cell division also  
93 occurred widely in the elongation zone of *fer-4* (Fig. S1D). These findings led us to  
94 ask whether the stronger regeneration ability of *fer-4* resulted from the lower  
95 differentiation state. Correspondingly, *fer-4* exhibited many more lateral roots than the  
96 WT (Fig. S1E-F). It is likely that the lateral root-initiating cells of *fer-4* had stronger  
97 stemness or pluripotency, and the enhanced regeneration ability of *fer-4* may have  
98 been due to its lower differentiation state. However, overexpression of *FER* also led to  
99 increased meristematic size, yet the regeneration ability was slightly weaker than that  
100 of the WT (Fig. 1E-F). Therefore, the lower differentiation state of *fer-4* could not  
101 fully explain the elevation in regeneration competence. Otherwise, the enlarged  
102 meristem size in *FER-OE* should have increased the regeneration frequency. Overall,  
103 *FER* suppressed regeneration in roots after wounding.

#### 104 **RALF33 responds to wounding to regulate root regeneration**

105 A previous study indicated that injury caused by laser ablation did not affect the  
106 expression pattern of *FER* (3). Our data also showed that neither the expression  
107 pattern nor the protein abundance of *FER* was affected by resection (Fig S2A-B). On  
108 the other hand, the ligands of *FER* (i.e., RALFs) were reported to respond actively to  
109 environmental stimuli, and then to active or suppress *FER* (25). Interestingly, the root  
110 tip regeneration capacity of *llg1-2* (the loss-of-function mutant defective in a  
111 coreceptor of *FER*, Lorelei (*lre*)-like glycosylphosphatidylinositol (GPI)-anchored  
112 proteins (LLGs) (26) was clearly increased (Fig. S2C-D). These results imply that the  
113 molecular combination of RALFs and *FER* is required for root tip regeneration. To  
114 further determine whether a RALF (and if so, which RALF) is responsive to  
115 wounding and can regulate regeneration, we screened the *RALFs* that were expressed  
116 in the root meristem in the TAIR database. Accordingly, we obtained *RALF22*,  
117 *RALF23*, *RALF27*, *RALF31* and *RALF33* for further investigation. We also validated  
118 the expression pattern of the abovementioned RALFs by constructing GFP-tagged  
119 RALFs driven by their native promoters (Fig. S2E). Among them, *RALF33* showed

120 high expression in most cell types in the root meristem, including the stem cell niche,  
121 lateral root cap, epidermis, cortex, endodermis, pericycle and steles (Fig. S2E). We  
122 then analyzed the root tip regeneration rates of the *RALF* overexpression lines  
123 (*RALF-OEs*). The *RALF22* overexpression line (*RALF22-OE*) exhibited slightly  
124 enhanced regeneration ability compared to the WT (Fig. 2A). In contrast to the subtle  
125 phenotype of *RALF22-OE*, *RALF33-OE* indeed showed a significant increase in its  
126 regeneration capacity (Fig. 2A-B). Since *RALF33* was proven to be the ligand of *FER*  
127 (27), we hypothesized that the peptide *RALF33* functions together with its receptor  
128 *FER* to regulate root tip regeneration. To verify this hypothesis, we exogenously  
129 applied 200 nM *RALF33* to the stumps of the WT and *fer-4* after resection. The  
130 seedlings treated with *RALF33* showed an increased regeneration rate compared to  
131 that of the control seedlings, yet *RALF33* failed to promote the regeneration of *fer-4*  
132 (Fig. S3A-B). According to the expression profiles of *WOX5*, a marker of the  
133 quiescent center (QC), the mock seedlings exhibited a relatively broad expression  
134 pattern, indicating that the QC was not well formed (Fig. S3A). Meanwhile, in roots  
135 treated with *RALF33*, the narrow expression profile of *WOX5* was very similar to the  
136 pattern observed in intact roots, which showed 2 to 3 cells with pronounced *WOX5*  
137 expression. Correspondingly, *WOX5* in *fer-4* showed a narrow expression profile  
138 regardless of *RALF33* treatment (Fig. S3A). The expression pattern of *WOX5*  
139 indicated that *RALF33* accelerated QC regeneration. Interestingly, we observed many  
140 granular structures in the renewed columella cells of Col-0 (treated with 200 nM  
141 *RALF33*) and *fer-4* (with or without *RALF33*), with fewer structures observed in the  
142 Col-0 mock seedlings (Fig. S3A, indicated by red arrow). The granular structures  
143 observed were actually the starch granules in the columella, which are responsible for  
144 gravitropism. To confirm whether the enrichment of the granular structures observed  
145 reflected the improved renewal of the root caps, we performed a gravitropic response  
146 test 1 day after type III resection (22). Correspondingly, almost all the *fer-4* roots  
147 showed clear gravitropic bending 4 h after seedling rotation (Fig. S3C). Only ~16.2%  
148 of Col-0 seedlings showed a clear gravitropic response, but *RALF33* treatment  
149 significantly increased this frequency to 41.3% (Fig. S3C). Therefore, the

150 regeneration of columella cells in *fer-4* was significantly faster than that in Col-0, and  
151 RALF33 also promoted this process. In conclusion, RALF33 binds to its receptor  
152 FER to promote root tip regeneration, especially the QC and columella cells. Notably,  
153 treatment with RALF33 had a transient promoting effect on regeneration processes  
154 that was independent of the developmental stage.

155 We subsequently traced the dynamics of RALF abundance after wounding to  
156 determine whether RALF33 was responsive to wounding. Using the RALF-GFP  
157 marker lines, we found that RALF33 was more responsive to wounding than other  
158 RALFs (Fig. S4A-B). The RALF33 protein level increased rapidly (1 h) after  
159 resection and peaked at approximately 6 h (Fig. 2C-D). Importantly, we also observed  
160 RALF33 accumulation near the cutting site (Fig. 2D-E). The specificity of  
161 accumulation suggested an important role of RALF33 in the response to wounding.

162 Lags caused by de novo synthesis and GFP maturation have prevented the use of this  
163 marker line to study rapid dynamics that occur within a few minutes. To determine  
164 whether the upregulation of RALF33 was initiated quickly after resection, we  
165 quantified the expression levels of RALF33 at different time points via quantitative  
166 real-time PCR (qRT-PCR) (Fig. 2F). The increase in RALF33 expression was  
167 detectable as early as 15 min postresection and continued to increase in the  
168 subsequent 2 h. However, we did not detect changes within the first 5 min, when the  
169 early wounding signals (such as ROS) were active. The timing of RALF33 dynamics  
170 suggested that RALF33 may be located close to and relay the stereotypical signals of  
171 early wounding.

172 Collectively, we found that wounding induced rapid elevation in RALF33 levels in  
173 cells abutting the wounding site in the root tip, and RALF33 bound to FER to  
174 promote root tip regeneration. Notably, although only RALF33 was found to be  
175 responsive to wounding, we cannot rule out the possibility that other RALFs might be  
176 wound responsive.

177 ***FER* may regulate QC and columella regeneration by shaping the transcriptome**

178 **of low-differentiation cells in the stele**

179 We observed strong expression of a RALF (i.e., RALF33) in the stele (Fig. S2E).  
180 Interestingly, FER was also highly expressed in the stele (Fig S2A). These results led  
181 us to speculate about the important roles of RALF33 and FER in the stele. Importantly,  
182 we proved in a previous section that *RALF33-FER* could regulate the regeneration of  
183 QC and columella cells (Fig. S3). The regenerated columella cells originate from the  
184 stele (4); therefore, the physiology of stele cells is very likely shaped by *RALF33* and  
185 *FER*. To verify this hypothesis, we performed single-cell sequencing of the roots of  
186 the WT and *fer-4* (we will publish the detailed data from single-cell sequencing of  
187 *fer-4* in a separate work). The stele cells were classified into 4 clusters: pericycle,  
188 xylem, phenom and the low-differentiation type (which actually include the cambium,  
189 protoxylem and protophloem). Using the Spearman correlation coefficient of the  
190 transcriptome as an indicator, we discovered that the transcriptomes of cells with low  
191 differentiation in *fer-4* were greatly different from those in the WT-the correlation  
192 coefficient of the low-differentiation cell type in the above two genotypes was only  
193 0.45 (Fig. 3A) and was at the same level as those between different cell types (e.g.,  
194 the xylem and phloem in the WT). Consistent with the results revealed by correlation  
195 analysis, the number of differentially expressed genes (DEGs) in low-differentiation  
196 cells (normalized to the total number of detected genes) were approximately 4 times  
197 greater than those in xylem and phloem (Fig. 3B). We applied GO enrichment of the  
198 DEGs in low-differentiation cells from *fer-4* and WT. Seven of the GO terms among  
199 the top 20 terms were related to either wounding or regeneration (Fig. 3C). Therefore,  
200 transcriptomic variation in low-differentiation cells very likely contributed to the  
201 different regeneration rates of Col-0 and *fer-4*, especially that in the columella and  
202 QC.

203 **RALF33-FER regulates root tip regeneration through ERF115**

204 A previous review that summarized information on the genes currently known to be  
205 involved in root regeneration (28). We also examined the expression of these genes in  
206 the low-differentiation cells from Col-0 and *fer-4*. In total, 19 regeneration-related

207 genes were differentially expressed (Fig. S5A). Among them, *ERF115* and its  
208 downstream peptide *PSK5* were upregulated (Fig. S5A). In addition, among the  
209 regeneration-related genes in our RNA-seq data for roots of the WT and *fer-4*,  
210 *ERF115* and *PSK5* were markedly enriched in *fer-4* (Fig. 3D). We confirmed this  
211 result using the *pERF115::GUS* reporter line in the Col-0 and *fer-4* backgrounds (Fig.  
212 3E). The expression of *ERF115* was distinctly higher in the stele of *fer-4* (Fig. 3E).  
213 RALF33 treatment also stimulated *ERF115* expression, as revealed by using the  
214 *pERF115::GFP* marker line (Fig. 3F). *ERF115* is an essential factor for root tip  
215 regeneration, and overexpression of *ERF115* significantly promotes root tip  
216 regeneration (5, 29). Therefore, we postulated that *ERF115* could function  
217 downstream of the RALF33-FER signaling module to regulate root tip regeneration.

218 To demonstrate whether *ERF115* acts downstream of RALF33-FER, we applied 200  
219 nM RALF33 to the excised WT and *erf115* roots. Consistent with previous reports (5,  
220 29), the regeneration frequency of the *erf115* mutant was significantly lower than that  
221 of the WT (Fig. 3G). Meanwhile, RALF33 treatment failed to elevate the regeneration  
222 frequency of *erf115* (Fig. 3G).

223 We also generated a *fer-4 erf115* double mutant to determine whether *ERF115* acts  
224 downstream of *FER*. Although the defective root hairs of *fer-4 erf115* resembled those  
225 of *fer-4* (Fig. S5B), the meristem size of the double mutant was reduced compared to  
226 that of *fer-4* (Fig. S5C-D). Hence, the enlarged meristem rather than the abnormal  
227 root hairs of *fer-4* could be attributed to the perturbation of *ERF115*. The regeneration  
228 rate of *fer-4 erf115* was also reduced to a level similar to that of the WT (Fig. 3H). In  
229 conclusion, *ERF115* functions downstream of RALF33-FER to regulate root tip  
230 regeneration.

### 231 **TPL/TPRs serve as potential upstream regulators of ERF115**

232 Transcriptional regulation by *ERF115* of its downstream targets occurs in the nucleus,  
233 yet *FER* is located on the plasma membrane (30). Spatial compartmentalization  
234 prevents *FER* from directly regulating *ERF115*. *FER* most likely regulates *ERF115*



235 through its interacting proteins. Based on the results of our previous yeast two-hybrid  
236 (Y2H) screening (7), we focused on the transcriptional corepressor  
237 TOPLESS-RELATED 1 (TPR1). TPR1 belongs to the TPL/TPR protein family. The  
238 first identified member, TOPLESS (TPL), is known as a master regulator of root fate  
239 determination (31). In addition, TPL/TPRs also play an important role in maintaining  
240 the stemness of columella stem cells (32). These reports emphasized the possible role  
241 of TPL/TPRs in regeneration, because cell fate regulation via either root fate  
242 determination or stemness maintenance indicates the cytological nature of  
243 regeneration. Interestingly, TPR1 distributes in plasma, cytoplasm and nuclear (Fig.  
244 S6A). The subcellular localization of TPR1 also makes it possible to mediate the  
245 transcription regulation of *ERF115* by FER.

246 As gene expression coregulators, TPL/TPRs have many downstream targets (33). To  
247 further confirm the possibility that FER regulates gene expression by interacting with  
248 TPL/TPRs, we performed TF enrichment analysis in the iGRN and PlantTFBD  
249 databases (see Materials and Methods). TPL/TPRs are actually not TFs but can  
250 modulate gene expression by recruiting other TFs. Hence, we alternatively focused on  
251 the enrichment of proteins interacting with TPL/TPRs. By searching iGRN  
252 (<http://bioinformatics.psb.ugent.be/webtools/iGRN/>) (34) and PlantTFBD  
253 (<http://planttfdb.gao-lab.org/>) (35) using 1507 regeneration-related DEGs in  
254 low-differentiation cell clusters (Fig. 2C), we obtained 1260 and 567 TFs,  
255 respectively (Fig. S6B). The two shared 532 overlapping TFs, and 14 proteins among  
256 the 53 reported interacting proteins of TPL/TPRs were present among these 532  
257 overlapping TFs. Therefore, certain DEGs in the low-differentiation cells from the  
258 WT and *fer-4* were likely regulated by TPL/TPRs. We also analyzed the  
259 transcriptomic overlap of *fer-4* (36) and *tpltpr1tpr4* (33). In total, 1908 overlapping  
260 genes among the DEGs of *tpltpr1tpr4* and *fer-4* were identified (Fig S6C). The high  
261 degree of overlap supported the hypothesis that FER interacts with TPL/TPRs to  
262 regulate the expression of its downstream genes. GO enrichment analysis using the  
263 1908 overlapping genes revealed many GO terms related to wounding, such as

264 response to wounding and response to jasmonic acid (Fig. S6D). The above  
265 bioinformatic analysis strongly suggested that FER regulates downstream genes (e.g.,  
266 *ERF115*), especially those related to wounding, through TPL/TPRs.

### 267 **FER interacts with TPL/TPRs to promote their degradation**

268 To verify the hypothesis from the previous section, we examined the interactions  
269 between FER and TPL/TPRs. We cloned the full-length CDSs of the five TPL/TPR  
270 family members, namely, TPL, TPR1, TPR2, TPR3 and TPR4 (TPL/TPR-AD), into  
271 an activation domain (AD)-containing vector. The TPL/TPR-AD constructs were  
272 cotransformed with FER-CD-BD, a recombinant vector with the cytosolic domain of  
273 FER (FER-CD) fused to the binding domain (BD), to perform a Y2H assay. The Y2H  
274 assay clearly revealed the interactions of TPR1, TPR3 and TPR4 with FER-CD, as  
275 well as a weak interaction of TPL (Fig. 4A). We further examined the interaction of  
276 TPR1 using a split-luciferase system. An interaction between TPR1 and FER-CD was  
277 demonstrated, verifying the interaction between FER and TPL/TPRs (Fig. 4B). We  
278 also performed a coimmunoprecipitation assay to study their interaction *in vivo*. The  
279 TPL/TPRs coimmunoprecipitated with FER-Flag (Fig. 4C). For the pull-down assay,  
280 we first immunoprecipitated the TPR1-Myc protein from Myc-tagged transgenic  
281 seedlings. The TPR1-Myc protein could be pulled down by FER-GST, which  
282 indicated that FER is physiologically associated with TPR1 (Fig. 4D). The *in vitro*  
283 phosphorylation assay also revealed that the kinase domain of FER was sufficient for  
284 phosphorylating the N-terminus of TPR1 (Fig. 4E). Overall, FER interacted with  
285 TPL/TPRs both *in vivo* and *in vitro*.

286 What is the molecular significance of the interaction between FER and TPL/TPRs? To  
287 answer this question, we investigated the protein level of TPL/TPRs in response to  
288 RALF33 treatment in the WT and *fer-4*. We found that TPL/TPRs accumulated at  
289 significant levels in the *fer-4* mutant (Fig. 4F). Second, exogenous application of  
290 RALF33 led to the accumulation of TPL/TPRs in Col-0 but not in *fer-4* (Fig. 4F).  
291 Finally, when 100  $\mu$ M proteasome inhibitor, cycloheximide (CHX), was applied to  
292 inhibit protein synthesis, the TPL/TPR levels were decreased more rapidly in the WT

293 than in *fer-4* (Fig. 4G). Taken together, the results showed that FER interacts with  
294 TPL/TPRs to reduce their half-life.

### 295 **FER interacts with TPL/TPRs to regulate root tip regeneration**

296 Does the increase in TPL/TPR abundance affect regeneration? To answer this  
297 question, we performed resection to investigate the regeneration of the triple mutant  
298 *tpltpr1tpr4* and performed overexpression of *TPR1* (*TPR1-OE*; Fig. 5A). The  
299 *tpltpr1tpr4* mutant showed an attenuated regeneration frequency versus the WT, while  
300 *TPR1-OE* exhibited a stronger regeneration capacity (Fig. 5A-B). Application of 200  
301 nM RALF33 to the resected *tpltpr1tpr4* stump demonstrated that TPL/TPRs function  
302 downstream of RALF33 to regulate regeneration, as *tpltpr1tpr4* was less sensitive to  
303 RALF33 (Fig. S7A-B). Hence, TPL/TPRs act as signal repeaters downstream of  
304 RALF33-FER to ultimately regulate regeneration. We also crossed *fer-4* with  
305 *tpltpr1tpr4* and obtained *tpr1fer-4* and *tpr1tpr4fer4*. the regeneration rates of *tpr1fer-4*  
306 and *tpr1tpr4fer-4* were lower than that of *fer-4* (Fig. 5C- D). Collectively, the results  
307 show that RALF33-FER interacts with Col-0 and *fer-4* to regulate root tip  
308 regeneration.

### 309 **TPL/TPR regulates the expression of *ERF115***

310 We asked whether TPL/TPRs could regulate *ERF115* expression. Using qRT-PCR,  
311 we revealed a lower *ERF115* expression level in *tpltpr1tpr4* cells than in *TPR1-OE*  
312 cells (Fig. 5E). Moreover, TPL/TPRs interacted with the promoter of *ERF115* to  
313 regulate its expression, as indicated by ChIP-qPCR (Fig. 5F). This result is consistent  
314 with their corresponding phenotypes, which suggested that TPL/TPRs promote root  
315 tip regeneration (Fig. 5A-B).

## 316 **DISCUSSION**

317 Based on our results, we proposed the following model: RALF33-FER can respond to  
318 wounding and transduce wounding-related signals by interacting with TPL/TPRs to  
319 ultimately regulate the expression of *ERF115*, a key TF involved in root tip

320 regeneration (5, 29). The most significant result of this study is the elucidation of a  
321 molecular pathway serves as an early signaling module between wounding and  
322 regeneration.

323 Wounding-induced regeneration actually includes two processes: wounding and  
324 regeneration (37). However, to date, studies have mainly investigated these two  
325 events independently (28). Knowledge of the molecular basis of these two events is  
326 scarce. Our research shed light on RALF-FER as a functional module involved in this  
327 process. In our proposed model, the RALF33 protein responds within 1 h, and  
328 *RALF33* mRNA can respond to wounding in tens of minutes. Since the initiation of  
329 regeneration usually takes several hours (22, 28), it is quite reasonable that RALF33  
330 serves as an earlier signaling molecule that transduces wounding-related signals for  
331 regeneration.

332 According to a previous publication, FER can sense wounding (15). What is the  
333 physiological significance of employing RALF33 to respond to wounding, since it  
334 seems achievable with FER alone? Importantly, cutting alone causes disruption of the  
335 cell wall in a single layer of cells near the incision, yet regeneration can be observed  
336 broadly around the wounding site (22). However, this phenomenon can be better  
337 explained if we take RALFs into consideration. Because RALFs are diffusible, they  
338 cause the regeneration of the surrounding cells by diffusing into intact cells that are  
339 distant from the incision (Murphy and De, 2014). Efforts should be made in the future  
340 to reveal the mechanism by which RALF33 and FER are regulated by wounding.

341 The regenerated root tip originates not from specific cryptic stem cells but multiple  
342 tissues from the remaining stump (4). Specifically, cells in the stele are respecified  
343 into stem cells to generate the QC and columella (4). It remains unknown whether this  
344 process is independent of the regeneration of other cell types (such as the cortex), and  
345 the mechanism underlying the regeneration of the QC and columella is unknown. The  
346 expression patterns of *RALFs* and *FER* suggested their important role in the stele (Fig.  
347 S2A, E). The accelerated QC and columella regeneration clearly reflected the  
348 differences in the physiology of stelar cells. We further revealed the difference in the

349 distinct transcriptomes of low-differentiation cells in the stele. Therefore, it is likely  
350 that RALF-FER controls the regeneration of the QC and columella by shaping the  
351 transcriptome of low-differentiation cells in the stele. Our results provide a possible  
352 model to explain how a certain cell population is regenerated.

353 A previous publication indicated that TPL/TPRs act as corepressors (38). Here, we  
354 found that TPL/TPRs promoted the expression of *ERF115* and that the expression  
355 level of *ERF115* in *tpltpr1tpr4* was decreased. Unfortunately, we have not make  
356 further efforts to resolve this contradiction. It is not that surprising since there are  
357 many studies on the bilateral effects of transcription regulators (39). Take PIFs as an  
358 example; an individual gene may respond to PIFs inversely, and the same PIF may  
359 either up- or downregulate the expression of different genes (39).

360 In conclusion, the signaling pathway between wounding and regeneration still  
361 requires future investigation. Our research introduces the role of RLKs in this  
362 pathway. These processes also represent the checkpoints between wounding and  
363 downstream reactions, such as regeneration. Elucidation of this mechanism could  
364 provide molecular targets for genetic manipulation and improvement by, for example,  
365 grafting, cutting, and callus induction. We believe that further exploration of this topic  
366 will be helpful and yield promising results.

## 367 **MATERIALS AND METHODS**

368 For full and detailed methods please se *SI Appendix, Materials and Methods*.

### 369 **Plant materials and growth conditions**

370 The *Arabidopsis thaliana* ecotype C24 was used as a wild-type control for *srn*. In  
371 addition, Col-0 was the control for other mutants. The loss-of-function mutant *fer-4*  
372 was described previously (40). The *llg1-2* (*CS66106*) mutant was kindly provided by  
373 Doctor C. Li (Li et al, 2015). The *erf115* (*SALK\_021981*) mutants, *ERF115-GUS* and  
374 *ERF115-GFP-GUS* were used in previous research (5, 29). The triple mutant  
375 *tpltpr1tpr4* and TPR1-OE were provided by Doctor J.B. Jin (41). *ERF115-GFP-GUS*

376 (referred to as *ERF115-GFP* in the text) has been reported previously (5, 29).

377 To generate the GFP-tagged reporter line of *RALF22* (*AT3G05490*), *RALF23*  
378 (*AT3G16570*), *RALF27* (*AT3G29780*), *RALF31* (*AT4G13950*), and *RALF33*  
379 (*AT4G15880*), DNA fragments of GFP-tagged full-length RALF CDSs under the  
380 driven by their native promoter were cloned into the pCAMBIA1300 backbone. The  
381 tagged *pCambia-1300-pRALFs::RALFs-GFP* constructs were then transformed into  
382 the Col-0 ecotype to generate the corresponding seedlings. The RALF overexpression  
383 constructs were generated by introducing the full-length CDSs carried by the pDT1  
384 backbone into Col-0.

385 Arabidopsis seeds were surface sterilized by treating with 75% ethanol for 5 min  
386 followed by sodium hypochlorite for 15 min. The samples were washed 5 to 6 times  
387 with sterilized deionized water and sown on half-strength MS medium (1/2 MS  
388 medium) with 1% sucrose and 1% agar. The seeds were stratified in the dark at 4°C  
389 for 2 days and were subsequently transferred to a growth chamber under controlled  
390 conditions. The parameters of the growth chamber were set as follows: 22°C, 80%  
391 (relative humidity), 16/8-h light/dark.

### 392 **Root tip resection**

393 The root tip resection method was based on the description in a previous report (22).  
394 Resection was conducted using 3-day-old seedlings grown on 1/2 MS medium.  
395 Seedlings were placed on 1/2 MS medium with 5× agar and loaded onto a dissecting  
396 microscope stage for root tip removal (22). According to the excision position, the  
397 resection method was classified into 4 types, namely, the I, II, III and IV types,  
398 involving the removal of the QC, 1/2 the meristem, 3/4 the meristem and the whole  
399 meristem, respectively. After resection, seedlings were quickly stained with 10 µg/µl  
400 propidium iodide (PI) to determine the resection type under a confocal microscope.  
401 Finally, the seedlings were moved onto 1/2 MS medium containing 50 µM ampicillin  
402 for antibiosis.

403 To apply the RALF33 peptide to the resected stumps, RALF33 diluted in 1/2 MS

404 liquid medium was dropped onto a small filter paper piece. The resected roots were  
405 covered with paper pieces containing 200 nM RALF33, and the dishes were returned  
406 to the growth chamber for 72 h. The seedlings were then ready for examination of  
407 regeneration.

## 408 **ACKNOWLEDGEMENTS**

409 This work was supported by grants from the National Natural Science Foundation of China  
410 (NSFC-32070769, 31871396), supported by the science and technology innovation Program  
411 of Hunan Province (No.2020WK2014, 2022WK2007, 2021JJ10015), and the China Tobacco  
412 Hunan Industrial Co.,Ltd. Research Project (KY2021YC0001).

## 413 **AUTHOR CONTRIBUTIONS**

414 F. Yu., W.K. Zhou., and Q.J. Xie conceived the project; Q.J. Xie, W.K. Zhou and F.Yu.  
415 designed research; Q.J. Xie, W.J. Chen, S.L. Ouyang and X.N. Wang performed research; F.  
416 Xu, Y.R. Wang and L.F. Mao analyzed data; Q.J. Xie and F.Yu. wrote the paper; all authors  
417 reviewed and approved the manuscript for publication.

## 418 **DECLARATION OF INTERESTS**

419 The authors declare no competing interests.

## 420 **DATA AVAILABILITY**

421 The data that support the findings of this study are available from the corresponding author  
422 upon reasonable request.

## 423 **REFERENCES**

- 424 **1. Iwase A, Mita K, Nonaka S, Ikeuchi M, Koizuka C, Ohnuma M, Ezura H, Imamura J,**  
425 **Sugimoto K** (2015). WIND1-based acquisition of regeneration competency in  
426 Arabidopsis and rapeseed. *J Plant Res* **128**(3): 389-97
- 427 **2. Yan C, Fan M, Yang M, Zhao J, Zhang W, Su Y, Xiao L, Deng H, Xie D** (2018) Injury  
428 activates  $\text{Ca}^{2+}$ /Calmodulin-dependent phosphorylation of JAV1-JAZ8-WRKY51

- 429 complex for jasmonate biosynthesis. *Mol Cell* **70**(1): 136-149 e7
- 430 **3. Marhava P, Hoermayer L, Yoshida S, Marhavy P, Benkova E, Friml J** (2019).  
431 Re-activation of stem cell pathways for pattern restoration in plant wound healing. *Cell*  
432 **177**(4): 957-969 e13
- 433 **4. Efroni I, Mello A, Nawy T, Ip PL, Rahni R, DelRose N, Powers A, Satija R, Birnbaum**  
434 **KD** (2016). Root Regeneration Triggers an Embryo-like Sequence Guided by Hormonal  
435 Interactions. *Cell* **165**(7): 1721-1733
- 436 **5. Zhou W, Lozano-Torres JL, Blilou I, Zhang X, Zhai Q, Smant G, Li C, Scheres B**  
437 (2019). A jasmonate signaling network activates root stem cells and promotes  
438 regeneration. *Cell* **177**(4): 942-956 e1
- 439 **6. Niyogi KK, Fink GR** (1992). Two anthranilate synthase genes in Arabidopsis:  
440 defense-related regulation of the tryptophan pathway. *Plant Cell* **4**(6): 721-33
- 441 **7. Chen J, Yu F, Liu Y, Du C, Li X, Zhu S, Wang X, Lan W, Rodriguez PL, Liu X, Li D,**  
442 **Chen L, Luan S** (2016). FERONIA interacts with ABI2-type phosphatases to facilitate  
443 signaling cross-talk between abscisic acid and RALF peptide in Arabidopsis. *Proc Natl*  
444 *Acad Sci U S A* **113** (37): E5519-27
- 445 **8. Zhang G, Zhao F, Chen L, Pan Y, Sun L, Bao N, Zhang T, Cui CX, Qiu Z, Zhang Y,**  
446 **Yang L, Xu L** (2019). Jasmonate-mediated wound signalling promotes plant  
447 regeneration. *Nat Plants* **5**(10): 491-497
- 448 **9. Liu J, Sheng L, Xu Y, Li J, Yang Z, Huang H, Xu L** (2014). WOX11 and 12 are  
449 involved in the first-step cell fate transition during de novo root organogenesis in  
450 Arabidopsis. *Plant Cell* **26**(3): 1081-93
- 451 **10. Kareem A, Durgaprasad K, Sugimoto K, Du Y, Pulianmackal AJ, Trivedi ZB,**  
452 **Abhayadev PV, Pinon V, Meyerowitz EM, Scheres B, Prasad K** (2015). PLETHORA  
453 Genes Control Regeneration by a Two-Step Mechanism. *Curr Biol* **25**(8): 1017-30
- 454 **11. Iwase A, Harashima H, Ikeuchi M, Rymen B, Ohnuma M, Komaki S, Morohashi K,**  
455 **Kurata T, Nakata M, Ohme-Takagi M, Grotewold E, Sugimoto K** (2017). WIND1  
456 Promotes Shoot Regeneration through Transcriptional Activation of ENHANCER OF  
457 SHOOT REGENERATION1 in Arabidopsis. *Plant Cell* **29**(1): 54-69
- 458 **12. Liu W, Zhang Y, Fang X, Tran S, Zhai N, Yang Z, Guo F, Chen L, Yu J, Ison MS,**



- 459 **Zhang T, Sun L, Bian H, Zhang Y, Yang L, Xu L** (2022). Transcriptional landscapes  
460 of de novo root regeneration from detached Arabidopsis leaves revealed by time-lapse  
461 and single-cell RNA sequencing analyses. *Plant Commun* **3**(4): 100306
- 462 **13. Foyer CH, Noctor G** (2016). Stress-triggered redox signalling: what's in pROSpect?  
463 *Plant Cell Environ* **39**(5): 951-64
- 464 **14. Waszczak C, Carmody M, Kangasjarvi J** (2018). Reactive oxygen species in plant  
465 signaling. *Annu Rev Plant Biol* **69**: 209-236
- 466 **15. Feng W, Kita D, Peaucelle A, Cartwright HN, Doan V, Duan Q, Liu MC, Maman J,**  
467 **Steinhorst L, Schmitz-Thom I, Yvon R, Kudla J, Wu HM, Cheung AY, Dinneny JR**  
468 (2018). The FERONIA Receptor Kinase Maintains Cell-Wall Integrity during Salt Stress  
469 through Ca<sup>2+</sup> Signaling. *Curr Biol* **28**(5): 666-675 e5
- 470 **16. Ngo QA, Vogler H, Lituiev DS, Nestorova A, Grossniklaus U** (2014). A calcium dialog  
471 mediated by the FERONIA signal transduction pathway controls plant sperm delivery.  
472 *Dev Cell* **29**(4): 491-500
- 473 **17. Masachis S, Segorbe D, Turra D, Leon-Ruiz M, Furst U, El Ghalid M, Leonard G,**  
474 **Lopez-Berges MS, Richards TA, Felix G, Di Pietro A** (2016). A fungal pathogen  
475 secretes plant alkalizing peptides to increase infection. *Nat Microbiol* **1**(6): 16043
- 476 **18. Stegmann M, Monaghan J, Smakowska-Luzan E, Rovenich H, Lehner A, Holton N,**  
477 **Belkhadir Y, Zipfel C** (2017). The receptor kinase FER is a RALF-regulated scaffold  
478 controlling plant immune signaling. *Science* **355**(6322): 287-289
- 479 **19. Zhang X, Peng H, Zhu S, Xing J, Li X, Zhu Z, Zheng J, Wang L, Wang B, Chen J,**  
480 **Ming Z, Yao K, Jian J, Luan S, Coleman-Derr D, Liao H, Peng Y, Peng D, Yu F**  
481 (2020). Nematode-encoded RALF peptide mimics facilitate parasitism of plants through  
482 the FERONIA receptor kinase. *Mol Plant* **13**(10): 1434-1454
- 483 **20. Deslauriers SD, Larsen PB** (2010). FERONIA is a key modulator of brassinosteroid and  
484 ethylene responsiveness in Arabidopsis hypocotyls. *Mol Plant* **3**(3): 626-40
- 485 **21. Yu F, Li J, Huang Y, Liu L, Li D, Chen L, Luan S** (2014). FERONIA receptor kinase  
486 controls seed size in Arabidopsis thaliana. *Mol Plant* **7**(5): 920-2
- 487 **22. Sena G, Wang X, Liu HY, Hofhuis H, Birnbaum KD** (2009). Organ regeneration does  
488 not require a functional stem cell niche in plants. *Nature* **457**(7233): 1150-3

- 489 **23. Duan Q, Kita D, Li C, Cheung AY, Wu HM** (2010). FERONIA receptor-like kinase  
490 regulates RHO GTPase signaling of root hair development. *Proc Natl Acad Sci U S A*  
491 **107**(41): 17821-6
- 492 **24. Escobar-Restrepo JM, Huck N, Kessler S, Gagliardini V, Gheyselinck J, Yang WC,**  
493 **Grossniklaus U** (2007). The FERONIA receptor-like kinase mediates male-female  
494 interactions during pollen tube reception. *Science* **317**(5838): 656-60
- 495 **25. Zhang X, Yang Z, Wu D, Yu F** (2020). RALF-FERONIA signaling: linking plant  
496 immune response with cell growth. *Plant Commun* 1: 100084
- 497 **26. Li C, Yeh FL, Cheung AY, Duan Q, Kita D, Liu MC, Maman J, Luu EJ, Wu BW,**  
498 **Gates L, Jalal M, Kwong A, Carpenter H, Wu HM** (2015).  
499 Glycosylphosphatidylinositol-anchored proteins as chaperones and co-receptors for  
500 FERONIA receptor kinase signaling in Arabidopsis. *Elife* 4:e06587
- 501 **27. Liu C, Shen L, Xiao Y, Vyshedsky D, Peng C, Sun X, Liu Z, Cheng L, Zhang H, Han**  
502 **Z, Chai J, Wu HM, Cheung AY, Li C** (2021). Pollen PCP-B peptides unlock a stigma  
503 peptide-receptor kinase gating mechanism for pollination. *Science* **372**(6538): 171-175
- 504 **28. Ikeuchi M, Favero DS, Sakamoto Y, Iwase A, Coleman D, Rymen B, Sugimoto K**  
505 (2019). Molecular Mechanisms of Plant Regeneration. *Annu Rev Plant Biol* **70**: 377-406
- 506 **29. Heyman J, Cools T, Canher B, Shavialenka S, Traas J, Vercauteren I, Van den**  
507 **Daele H, Persiau G, De Jaeger G, Sugimoto K, De Veylder L** (2016). The  
508 heterodimeric transcription factor complex ERF115-PAT1 grants regeneration  
509 competence. *Nat Plants* 2(11): 16165
- 510 **30. Escobar-Restrepo JM, Huck N, Kessler S, Gagliardini V, Gheyselinck J, Yang WC,**  
511 **Grossniklaus U** (2007). The FERONIA receptor-like kinase mediates male-female  
512 interactions during pollen tube reception. *Science* **317**(5838): 656-60
- 513 **31. Smith ZR, Long JA** (2010). Control of Arabidopsis apical-basal embryo polarity by  
514 antagonistic transcription factors. *Nature* **464**(7287): 423-6
- 515 **32. Pi L, Aichinger E, van der Graaff E, Llavata-Peris CI, Weijers D, Hennig L, Groot E,**  
516 **Laux T** (2015). Organizer-derived WOX5 signal maintains root columella stem cells  
517 through chromatin-mediated repression of *CDF4* expression. *Dev Cell* **33**(5): 576-88
- 518 **33. Griebel T, Lapin D, Locci F, Kracher B, Bautor J, Qiu J, Concia L, Benhamed M,**

- 519 **Parker JE** (2021). Arabidopsis Topless-related 1 mitigates physiological damage and  
520 growth penalties of induced immunity. *bioRxiv* 2021.07.07.451397; Doi:  
521 10.1101/2021.07.07.451397.
- 522 **34. De Clercq I, Van de Velde J, Luo X, Liu L, Storme V, Van Bel M, Pottie R,**  
523 **Vaneechoutte D, Van Breusegem F, Vandepoele K** (2021). Integrative inference of  
524 transcriptional networks in Arabidopsis yields novel ROS signalling regulators. *Nat*  
525 *Plants* 7(4): 500-513
- 526 **35. Jin JP, Tian F, Yang DC, Meng YQ, Kong L, Luo JC and Gao G.** (2017). PlantTFDB  
527 4.0: toward a central hub for transcription factors and regulatory interactions in plants.  
528 *Nucleic Acids Research*, 45(D1):D1040-D1045.
- 529 **36. Li C, Liu X, Qiang X, Li X, Li X, Zhu S, Wang L, Wang Y, Liao H, Luan S, Yu F**  
530 (2018). EBPI nuclear accumulation negatively feeds back on FERONIA-mediated  
531 RALF1 signaling. *PLoS Biol* 16(10): e2006340
- 532 **37. Bidabadi SS, Jain SM** (2020). Cellular, Molecular, and Physiological Aspects of In Vitro  
533 Plant Regeneration. *Plants* (Basel) 9(6)
- 534 **38. Causier B, Lloyd J, Stevens L, Davies B** (2012). TOPLESS co-repressor interactions  
535 and their evolutionary conservation in plants. *Plant Signal Behav* 7(3): 325-8
- 536 **39. Zhang Y, Mayba O, Pfeiffer A, Shi H, Tepperman JM, Speed TP, Quail PH** (2013).  
537 A quartet of PIF bHLH factors provides a transcriptionally centered signaling hub that  
538 regulates seedling morphogenesis through differential expression-patterning of shared  
539 target genes in Arabidopsis. *PLoS Genet* 9(1): e1003244
- 540 **40. Yu F, Qian L, Nibau C, Duan Q, Kita D, Levasseur K, Li X, Lu C, Li H, Hou C, Li L,**  
541 **Buchanan BB, Chen L, Cheung AY, Li D, Luan S** (2012). FERONIA receptor kinase  
542 pathway suppresses abscisic acid signaling in Arabidopsis by activating ABI2  
543 phosphatase. *Proc Natl Acad Sci U S A* 109(36): 14693-8
- 544 **41. Niu, Lin XL, Kong X, Qu GP, Cai B, Lee J, Jin JB** (2019). SIZ1-Mediated  
545 SUMOylation of TPR1 Suppresses Plant Immunity in Arabidopsis. *Mol Plant* 12(2):  
546 215-228

547 **FIGURE LEGENDS**

548 **Fig. 1 FER suppresses root regeneration.**

549 (A) Schematic diagram of the four types of resection. Type I refers to removal of root  
550 tips below (and including) the QC. Type II involves cutting off half of the meristem.  
551 Type III involves cutting off 3/4 of the meristem. Type IV refers to the removal of the  
552 whole meristem.

553 (B) Representative root tips from Col-0, *fer-4*, C24 and *srn* at different time points  
554 after type III resection. Seedlings were stained with PI at 0 h and at 72 h after  
555 resection and were imaged by confocal microscopy. Bar = 50  $\mu$ m.

556 (C-D) Root tip regeneration frequencies 72 h after resection, described in (B). Bars  
557 represent the mean  $\pm$  SE of 3 independent experiments, with at least 15 technical  
558 replicates per trial (Student's t test,  $**p < 0.01$ ).

559 (E) Meristem length of the WT and *FER-OE* plants. The scatter dots shown indicate  
560 the meristem length of each independent root (Student's t test,  $***p < 0.001$ ).

561 (F) Regeneration frequencies of Col-0 and *FER-OE* 72 h after resection. Bars  
562 represent the mean  $\pm$  SE of 3 independent experiments, with at least 15 technical  
563 replicates per trial (Student's t test,  $*p < 0.05$ ).

564 **Fig. 2 Wounding induces RALF33 accumulation to regulate regeneration.**

565 (A) Regeneration rates of the *RALF* overexpression lines following type III resection.  
566 Bars represent the mean  $\pm$  SE of 3 independent experiments, with at least 15 technical  
567 replicates per genotype (one-way ANOVA,  $*p < 0.05$ ;  $**p < 0.01$ ).

568 (B) Representative images of *RALF33-OE* and WT roots 3 days after type III  
569 resection.

570 (C) *RALF33* abundances at different time points after type III resection. Boxplot  
571 centers show median ( $n > 10$  roots), and the box represents the interquartile range  
572 (one-way ANOVA,  $*p < 0.05$ ;  $**p < 0.01$ ).

573 (D) Confocal images of *RALF33-GFP* seedlings following type III resection. The  
574 white dashed lines represent the cutting sites. The red arrow indicates the accumulated  
575 *RALF33* near the wounding site. Bar = 100  $\mu$ m.

576 (E) Line profiles of GFP intensities at different distances from the incision. The line

577 charts were generated from the images in D.

578 (F) *RALF33* expression in roots at different time points after cutting was assessed by  
579 qRT-PCR. Each bar data point equals the mean  $\pm$  SE of 3 independent experiments,  
580 with 3 technical replicates for each time point (one-way ANOVA, n.s., not significant;  
581  $**p < 0.01$ ).

582 **Fig. 3 Single-cell RNA-seq analysis of cell clusters in the stele and ERF115**  
583 **functional downstream of RALF33.**

584 (A) Spearman correlation coefficient of the transcriptome in different cell types from  
585 Col-0 and *fer-4*. Correlation coefficients are indicated by circle areas and colors of  
586 each in the top right quadrant and can be directly assessed by the numbers in the  
587 lower left quadrant.

588 (B) DEGs/Total ratio in different cell types. ‘DEGs’ is the numbers of differentially  
589 expressed genes in Col-0 and *fer-4*. ‘Total’ is the number of total detectable genes.

590 (C) Top 20 GO terms of DEGs in low-differentiation cells of Col-0 and *fer-4*. The GO  
591 terms marked in red are those related to wounding or regeneration.

592 (D) Normalized gene expression levels of root regeneration-related genes in roots.  
593 Expression levels were obtained from RNA-seq data of Col-0 and *fer-4* roots (25),  
594 with 3 biological replicates. The expression level in *fer-4* was normalized to that in  
595 Col-0 (Student’s t test,  $***p < 0.001$ ).

596 (E) *ERF115::GUS* activities in roots of Col-0 and *fer-4*.

597 (F) *RALF33* induces the expression of *ERF115*. The images presented here are of the  
598 *pERF115::GFP-GUS* line following *RALF33* treatment.

599 (G) Regeneration rates of *erf115* in response to *RALF33* treatments. *RALF33* (200  
600 nM) was applied to the stumps of Col-0 and *erf115* after type III resection. Bars  
601 represent the mean  $\pm$  SE of 3 independent experiments, with at least 15 technical  
602 replicates per trial (Student’s t test,  $*p < 0.05$ ).

603 (H) Regeneration rates of the WT, *fer-4*, *fer-4 erf115* and *erf115* following type III  
604 resection. Bars represent the mean  $\pm$  SE of 3 independent experiments, with at least  
605 15 technical replicates per trial. The different lowercase letters indicate statistical

606 significance (one-way ANOVA).

607 **Fig. 4 FER interacts with and phosphorylates TPL/TPRs.**

608 (A) Yeast two-hybrid assay of FER and TPL/TPRs. Synthetic dropout medium (-His)  
609 containing 20 mM 3-amino-1,2,4-triazole was used to examine the interaction.

610 (B) Split-luciferase assay exhibiting the interaction between FER and TPR1. The  
611 cytosolic domain of FER and full-length TPR1 were used to test the interaction.

612 (C) Co-IP assay showing the interaction between FER and TPL/TPRs. Protein lysates  
613 from FER-Flag and Col-0 seedlings were immunoprecipitated by anti-Flag magnetic  
614 beads, and interactions were detected by an TPL/TPR antibody.

615 (D) GST pull-down assay of TPR1-myc and FER-CD.

616 (E) In vitro phosphorylation assay of TPR1-N and TPR1-C by FER-KD.

617 (F) TPL/TPRs abundances in Col-0 and *fer-4* at different time points following  
618 RALF33 treatments.

619 (G) Stability of TPL/TPRs in Col-0 and *fer-4* after RALF33 treatment. Protein  
620 stabilities were assessed using CHX to block de novo protein synthesis.

621 **Fig. 5 TPL/TPRs promote ERF115 expression to regulate root regeneration.**

622 (A) Representative images of Col-0, *tpltpr1tpr4* and *TPR1-OE* following 72 h of type  
623 III resection.

624 (B) Regeneration rates of Col-0, *tpltpr1tpr4* and *TPR1-OE*. Bars represent the mean  $\pm$   
625 SE of 3 independent experiments, with at least 15 technical replicates per trial  
626 (one-way ANOVA, \* $p < 0.05$ ; \*\* $p < 0.01$ ).

627 (C) Representative images of Col-0, *fer-4* and *tpr1tpr4fer-4* following 72 h of type III  
628 resection.

629 (D) Regeneration rates of Col-0, *fer-4*, *tpr1fer-4*, *tpr1tpr4fer-4*, *tpr1*, and *tpltpr1tpr4*.  
630 Bars represent the mean  $\pm$  SE of 3 independent experiments, with at least 15 technical  
631 replicates per trial (one-way ANOVA, \* $p < 0.05$ ).

632 (E) *ERF115* expression levels in Col-0, *tpltpr1tpr4* and *TPR1-OE* cells. Expression  
633 levels in *tpltpr1tpr4* and *TPR1-OE* were normalized relative to that in Col-0. Bars  
634 represent the mean  $\pm$  SE of 3 independent experiments, with 3 technical replicates per

635 trial (one-way ANOVA,  $*p < 0.05$ ;  $**p < 0.01$ ).

636 (F) ChIP analysis of the recruitment of TPR1 to the promoter of *ERF115*. ChIP was

637 performed using an anti-TPL/TPRs antibody. DNA quantification using qRT-PCR.

638 Bars represent the mean  $\pm$  SE of 3 independent experiments, with 3 technical

639 replicates per trial (Student's t test,  $***p < 0.001$ ).

**Fig. 1**

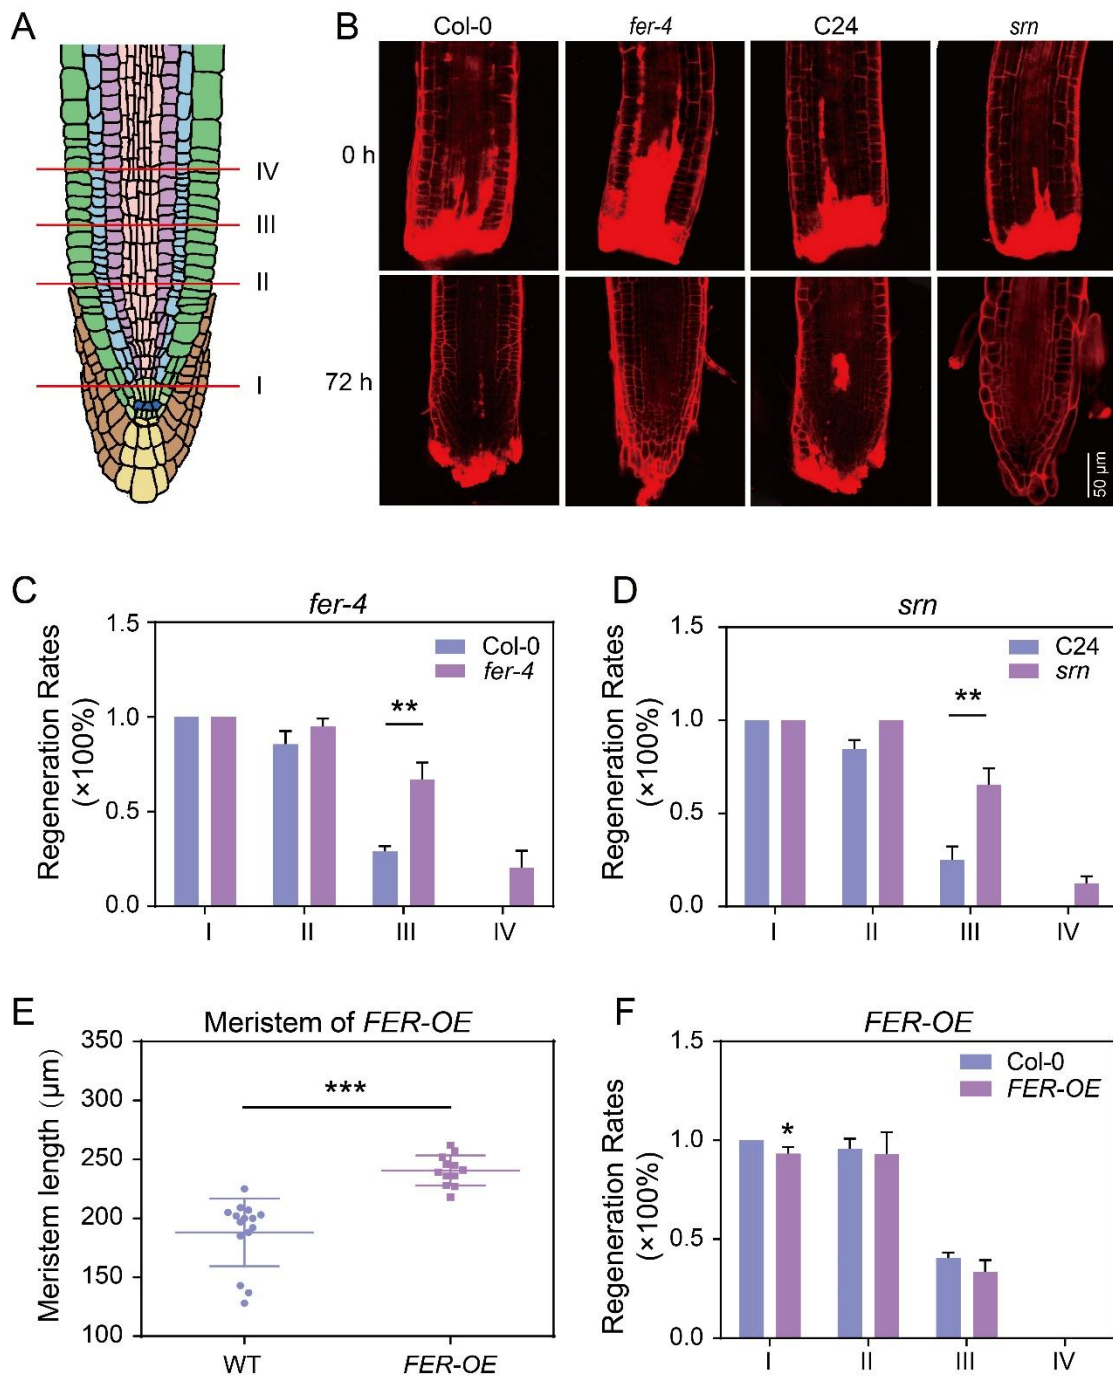



**Fig. 2**

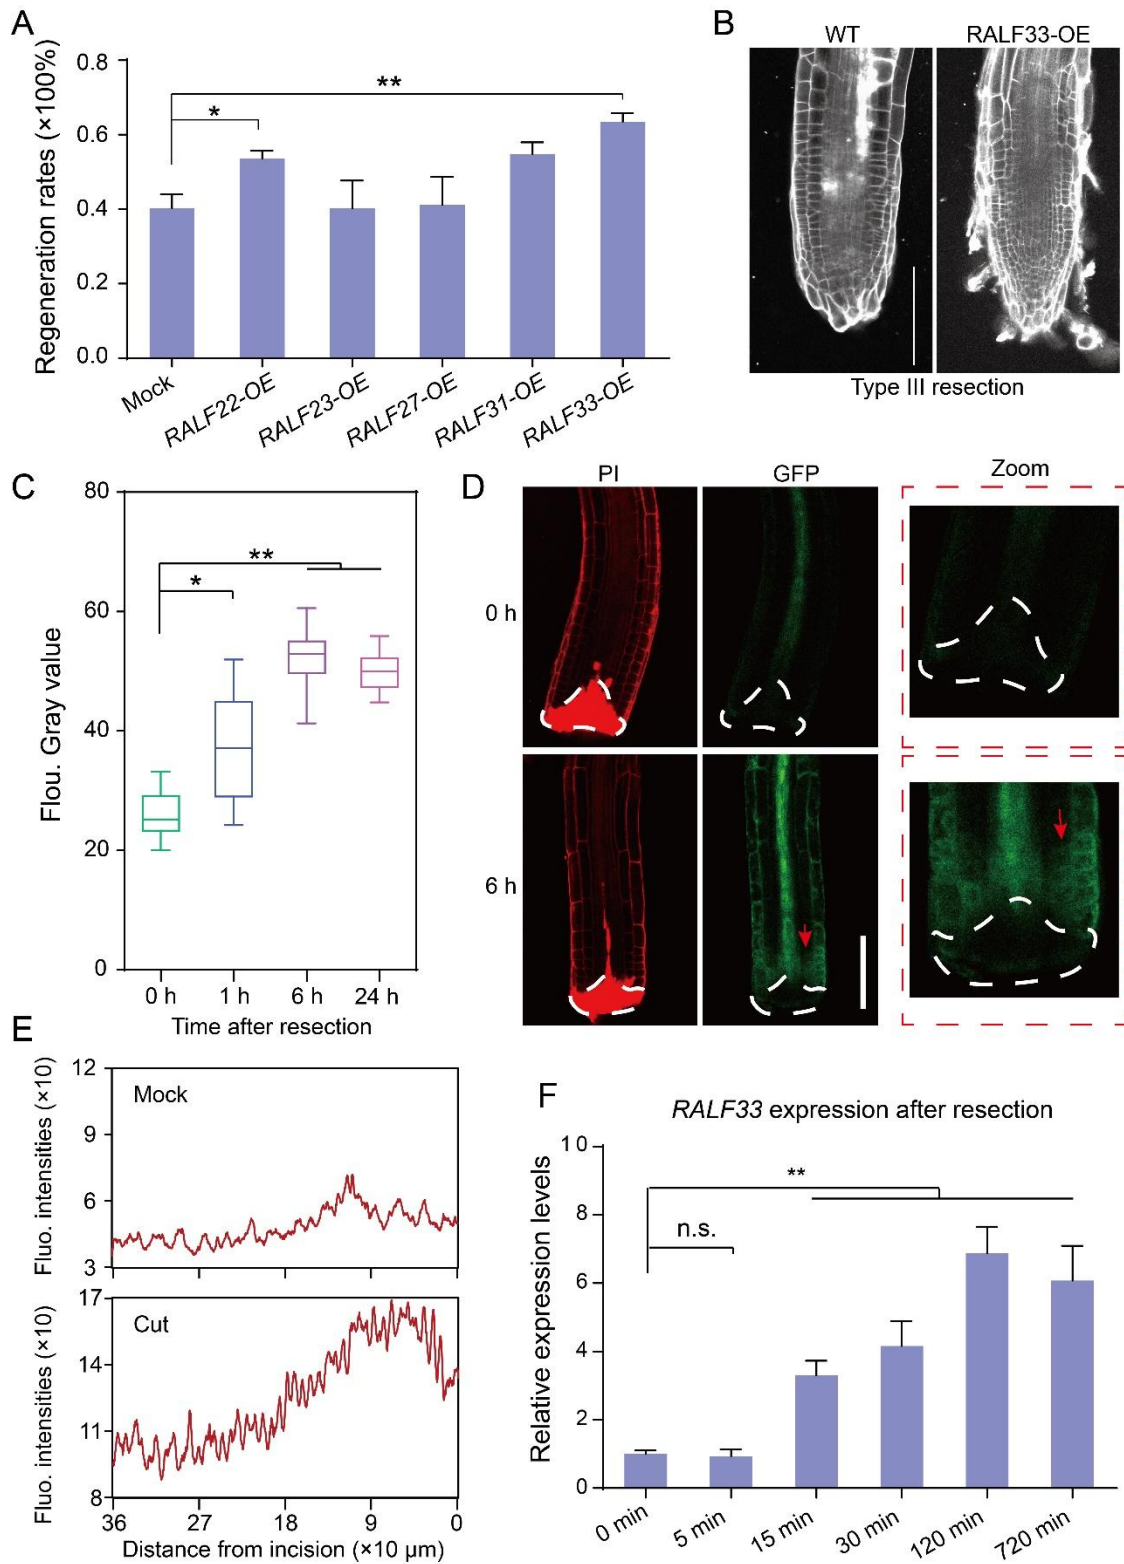

**Fig. 3**

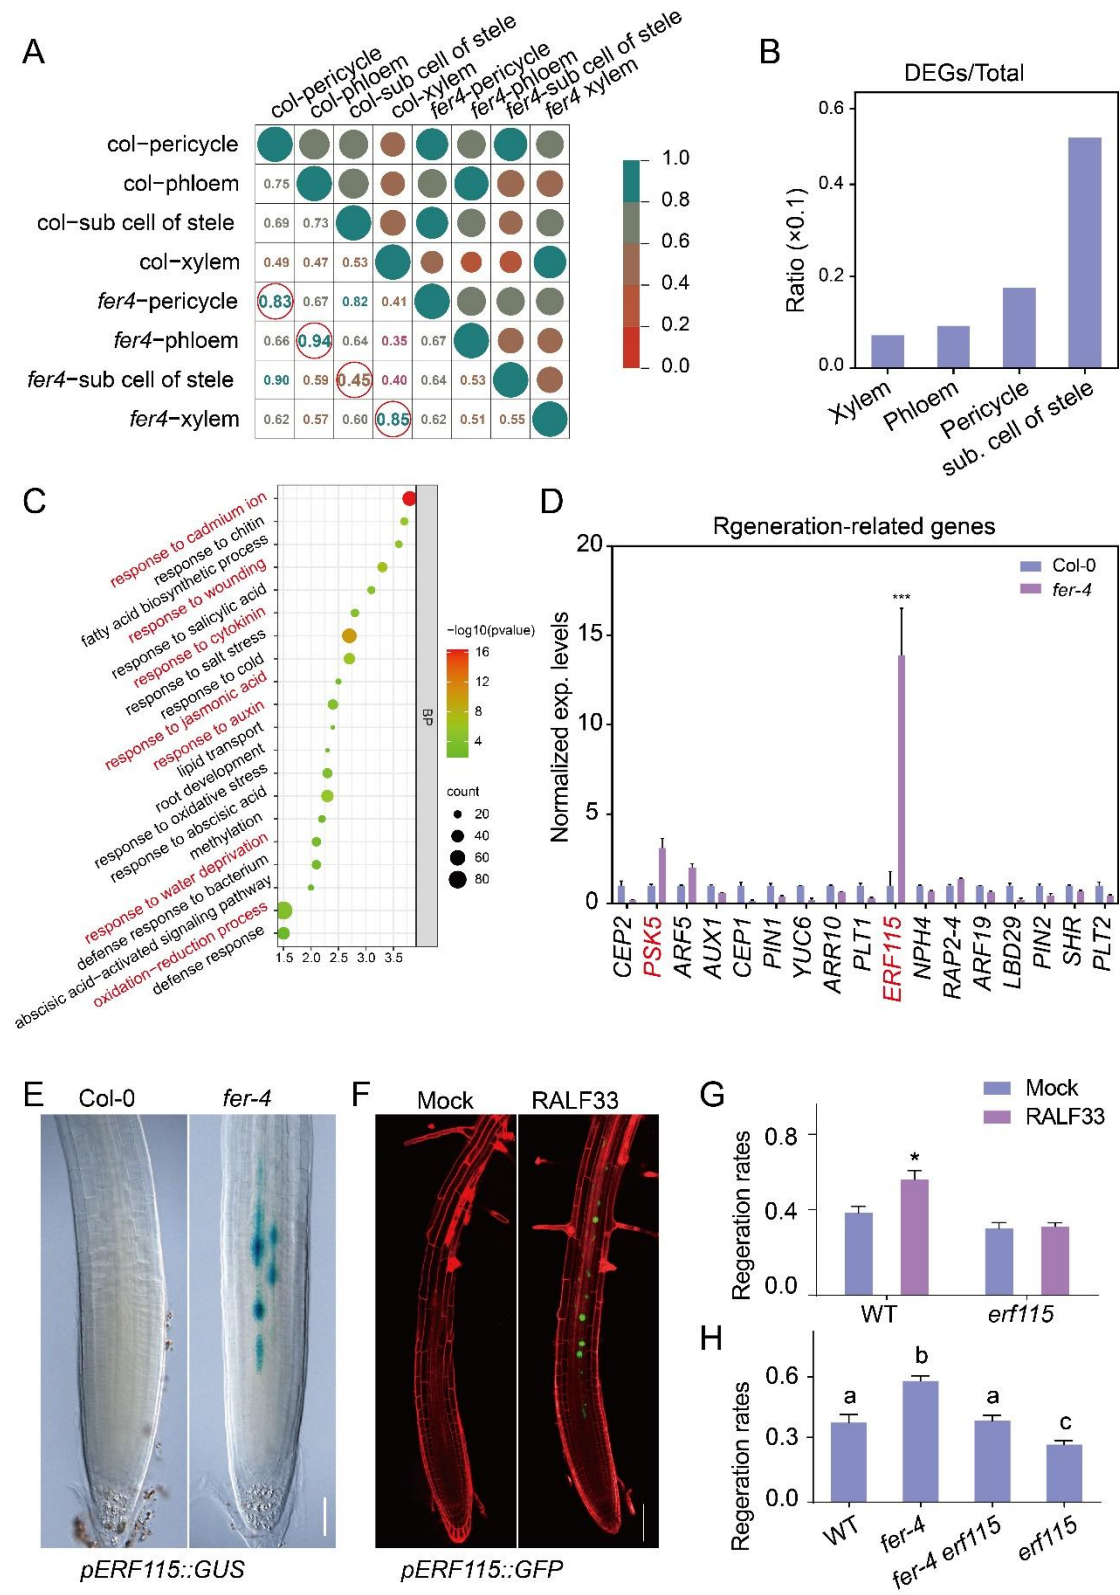



**Fig. 5**

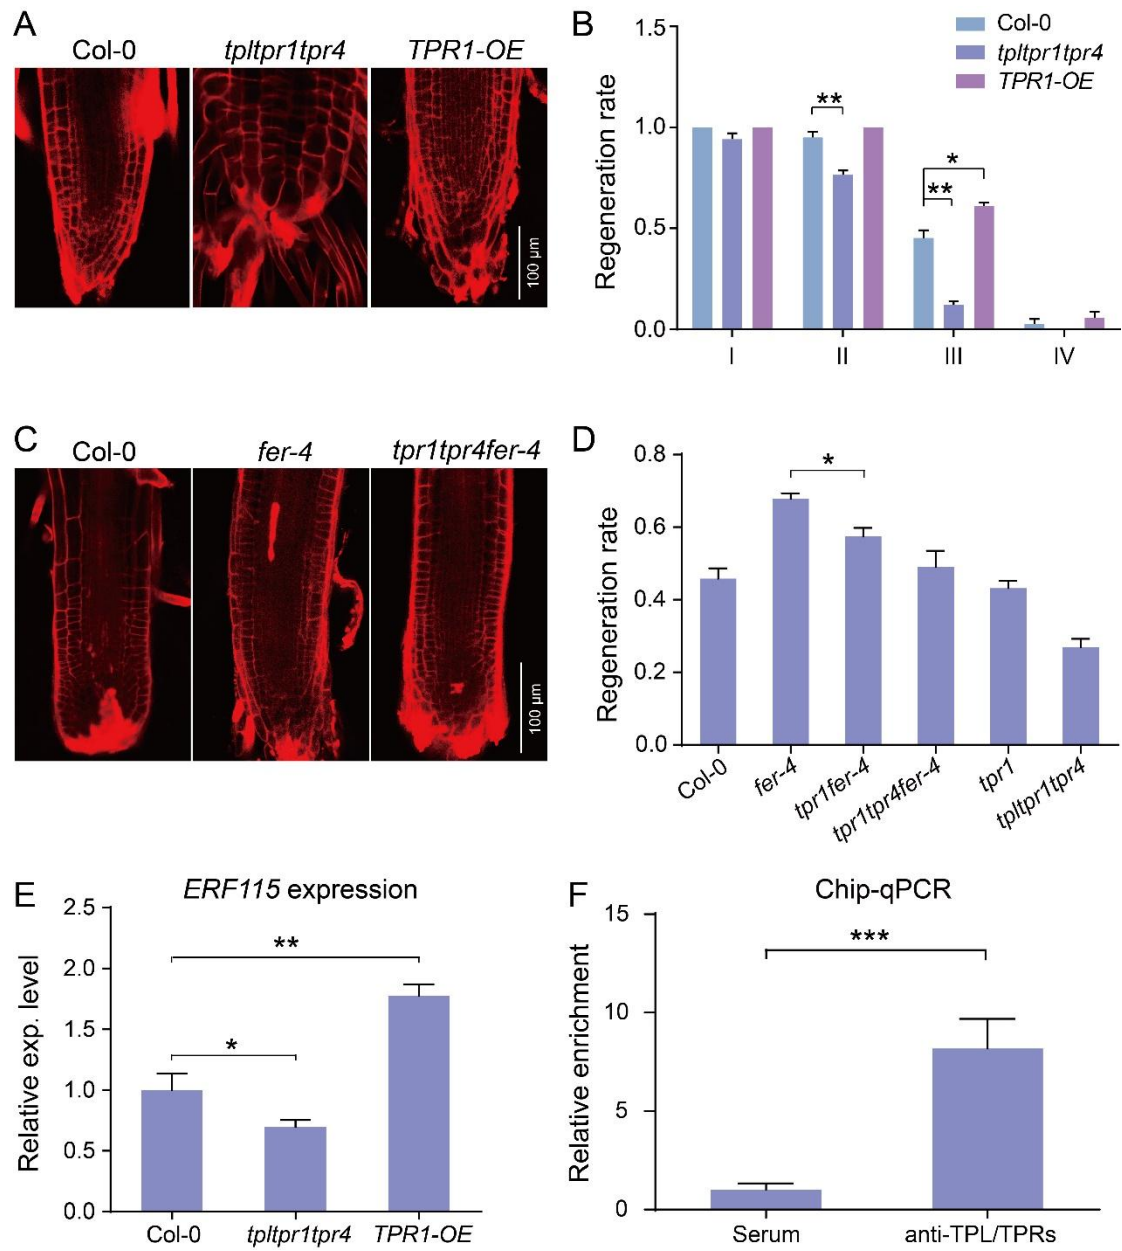

Source: https://www.biorxiv.org/content/10.1101/2022.08.27.505519v1.full.pdf
